# Supplementary material
Source: MDPI journal article supplement (https://www.mdpi.com/2073-4441/15/12/2299)
Supplement: s1 [file s1]

## TABLES

**Supplementary Table S1.** Sampling categories with corresponding sampling depths at station Struga (S1) (N 42.72285, E 16.88676) during investigating period. Sampling depths were categorized into Surface, Thermocline and DCM layer separated according to temperature (surface and thermocline) ranges and Chl *a* concentration (DCM). Surface layer: 22.6-25.5 °C; Thermocline layer: 17.3-22.3 °C; DCM layer: 0.120-0.222 µgL<sup>-1</sup> . Abbreviation: DCM (deep chlorophyll maximum).

| Date      | Sampling time (UTC) | Sample categories |                   |           |
|-----------|---------------------|-------------------|-------------------|-----------|
|           |                     | Surface layer     | Thermocline layer | DCM layer |
| 12.7.2021 | 5PM                 | 0                 | 12                | 75        |
| 13.7.2021 | 5AM                 | 0                 | 12                | 75        |
| 14.7.2021 | 5AM                 | 0,12              | -                 | 75        |
| 14.7.2021 | 5PM                 | 0                 | 5, 12             | 75        |
| 15.7.2021 | 5AM                 | 0                 | 12                | 75        |
| 15.7.2021 | 5PM                 | 0                 | 8, 12             | 75        |
| 16.7.2021 | 5AM                 | 0                 | 12                | 15,75     |
| 17.7.2021 | 5AM                 | 0                 | 12                | 75        |
| 17.7.2021 | 5PM                 | 0                 | 8, 12             | 75        |
| 18.7.2021 | 5AM                 | 0                 | 6, 12             | 30, 75    |
| 18.7.2021 | 5PM                 | 0                 | 8, 12             | 65        |
| 19.7.2021 | 5AM                 | 0,8               | 12, 18            | 65        |
| 19.7.2021 | 5PM                 | 0                 | 12                | 65        |
| 20.7.2021 | 5AM                 | 0                 | 12                | 65        |
| 20.7.2021 | 5PM                 | 0                 | 5, 12             | 65        |
| 21.7.2021 | 5AM                 | 0                 | 12, 16            | 65        |

**Supplemental Table S2.** eDNA samples (Station-depth-fraction-date) with numbers of raw input reads, filtrated, denoised and non-chimeric reads

| Sample ID                | 16S rRNA         |                    |                         | 18S rRNA         |                    |                         |
|--------------------------|------------------|--------------------|-------------------------|------------------|--------------------|-------------------------|
|                          | No. of raw reads | No. of clean reads | Shannon diversity index | No. of raw reads | No. of clean reads | Shannon diversity index |
| <b>S1-0m-02um-13721</b>  | 206517           | 181227             | 6.04                    | 127018           | 78970              | 6.86                    |
| <b>S1-0m-02um-20721</b>  | 190020           | 167664             | 7.08                    | 133384           | 93532              | 8.13                    |
| <b>S1-0m-20um-13721</b>  | 240989           | 210345             | 6.82                    | 119597           | 71447              | 4.83                    |
| <b>S1-0m-20um-20721</b>  | 117647           | 37360              | 5.85                    | 155726           | 112019             | 7.20                    |
| <b>S1-0m-3um-13721</b>   | 271223           | 237156             | 6.73                    | 111148           | 82291              | 6.90                    |
| <b>S1-0m-3um-20721</b>   | 228558           | 202703             | 6.06                    | 168768           | 114754             | 8.05                    |
| <b>S1-75m-02um-13721</b> | 181105           | 161572             | 7.82                    | 165289           | 104712             | 8.39                    |
| <b>S1-75m-20um-13721</b> | 139268           | 113708             | 5.07                    | 135787           | 98683              | 4.83                    |
| <b>S1-75m-3um-13721</b>  | 160018           | 141572             | 7.41                    | 146243           | 110289             | 8.21                    |

**Supplementary Table S3.** Principal component analysis (PCA) of environmental variables showing loadings (eigenvectors) of environmental variables, with highest values highlighted, and cumulative variability explained by PC1 and PC2 axis with corresponding eigenvalues.

|             |                            | PC1           | PC2          |
|-------------|----------------------------|---------------|--------------|
|             | Eigenvalues                | 2.48          | 1.19         |
|             | Variation explained (%)    | 49.6          | 73.4         |
| Eigenvalues | NO <sub>2</sub> (μM)       | -0.393        | 0.466        |
|             | <b>NO<sub>3</sub> (μM)</b> | <b>-0.602</b> | 0.072        |
|             | PO <sub>4</sub> (μM)       | -0.316        | 0.441        |
|             | SiO <sub>4</sub> (μM)      | -0.563        | -0.154       |
|             | <b>Temperature (°C)</b>    | 0.257         | <b>0.748</b> |

**Supplementary Table S4.** List of groups/taxa determined by the Utermöhl method from samples taken at Station Struga (S1) at Lastovo Island in the Adriatic Sea with corresponding maximum abundances (cellL<sup>-1</sup>), minimum abundances (cellL<sup>-1</sup>), and frequency of appearance in samples (%). The total number of samples is 60. Abbreviations - Min: minimum abundances, Max: maximum abundances, Fr: frequency of appearance, N.D: not determined

| List of taxa/groups                                         | Min  | Max  | Fr (%) |
|-------------------------------------------------------------|------|------|--------|
| <b>Diatoms</b>                                              |      |      |        |
| <i>Asterionellopsis glacialis</i> (Castracane) Round        | 1995 | 1995 | 1.67   |
| <i>Bacteriastrum jadrinum</i> Godrijan, Maric & Pfannkuchen | 380  | 380  | 1.67   |
| <i>Bacteriastrum delicatulum</i> Cleve                      | 140  | 1135 | 3.33   |
| <i>Bacteriastrum</i> sp.                                    | 20   | 285  | 8.33   |
| <i>Cerataulina pelagica</i> (Cleve) Hendey                  | 20   | 1325 | 26.67  |
| <i>Chaetoceros affinis</i> Lauder                           | 120  | 1515 | 3.33   |
| <i>Chaetoceros anastomosans</i> Grunow                      | 80   | 100  | 3.33   |
| <i>Chaetoceros atlanticus</i> Cleve                         | 20   | 20   | 1.67   |
| <i>Chaetoceros brevis</i> F.Schütt                          | 60   | 60   | 1.67   |
| <i>Chaetoceros</i> cf. <i>constrictus</i> Gran              | 140  | 140  | 1.67   |
| <i>Chaetoceros convolutus</i> Castracane                    | 40   | 40   | 1.67   |
| <i>Chaetoceros compressus</i> Lauder                        | 80   | 1700 | 11.67  |
| <i>Chaetoceros curvius</i> Cleve                            | 60   | 1325 | 10.00  |
| <i>Chaetoceros dadayi</i> Pavillard                         | 60   | 190  | 5.00   |

|                                                                 |      |       |       |
|-----------------------------------------------------------------|------|-------|-------|
| <i>Chaetoceros danicus</i> Cleve                                | 20   | 190   | 10.00 |
| <i>Chaetoceros decipiens</i> Cleve                              | 40   | 1510  | 10.00 |
| <i>Chaetoceros diversus</i> Cleve                               | 40   | 570   | 5.00  |
| <i>Chaetoceros lacinosus</i> F.Schütt                           | 200  | 200   | 1.67  |
| <i>Chaetoceros messanensis</i> Castracane                       | 220  | 1700  | 5.00  |
| <i>Chaetoceros rostratus</i> Ralfs                              | 40   | 1135  | 11.67 |
| <i>Chaetoceros simplex</i> Ostensfeld                           | 20   | 190   | 21.67 |
| <i>Chaetoceros</i> sp.                                          | 40   | 2460  | 38.33 |
| <i>Chaetoceros socialis</i> H.S.Lauder                          | 140  | 1130  | 5.00  |
| <i>Chaetoceros tenuissimus</i> Meunier                          | 20   | 380   | 8.33  |
| <i>Chaetoceros wighamii</i> Brightwell                          | 1325 | 1325  | 1.67  |
| <i>Chaetoceros vixvisibilis</i> Schiller                        | 755  | 2270  | 5.00  |
| <i>Cocconeis</i> sp.                                            | 140  | 140   | 1.67  |
| <i>Cyclotella choctawhatcheeana</i>                             | 40   | 40    | 1.67  |
| <i>Cylindrotheca closterium</i> (Ehrenberg) Reimann & J.C.Lewin | 20   | 945   | 53.33 |
| <i>Dactyliosolen fragilissimus</i> (Bergon) Hasle               | 20   | 755   | 23.33 |
| <i>Diploneis bombus</i> (Ehrenberg) Ehrenberg                   | 190  | 380   | 5.00  |
| <i>Entomoneis</i> sp.                                           | 190  | 190   | 3.33  |
| <i>Guinardia flaccida</i> (Castracane) Peragallo                | 20   | 570   | 51.67 |
| <i>Guinardia striata</i> (Stolterfoth) Hasle                    | 20   | 2270  | 51.67 |
| <i>Haslea wawriake</i> (Hustedt) Simonsen                       | 190  | 190   | 1.67  |
| <i>Hemiaulus chinensis</i> Greville                             | 20   | 1135  | 51.67 |
| <i>Hemiaulus hauckii</i> Grunow ex Van Heurck                   | 60   | 755   | 11.67 |
| <i>Leptocylindrus danicus</i> Cleve                             | 60   | 3220  | 53.33 |
| <i>Leptocylindrus mediterraneus</i> (H.Peragallo) Hasle         | 40   | 1135  | 15.00 |
| <i>Licmophora</i> sp.                                           | 20   | 380   | 6.67  |
| <i>Lioloma pacificum</i> (Cupp) Hasle                           | 190  | 190   | 1.67  |
| <i>Nitzschia longissima</i> (Brébisson) Ralfs                   | 60   | 380   | 16.67 |
| N.D. penatae                                                    | 20   | 1135  | 85.00 |
| cf. <i>Plagiotropis</i> Pfitzer                                 | 190  | 190   | 1.67  |
| <i>Pleurosigma</i> sp.                                          | 20   | 190   | 8.33  |
| <i>Proboscia alata</i> (Brightwell) Sundström                   | 20   | 1325  | 80.00 |
| <i>Proboscia indica</i> (H.Peragallo) Hernández-Becerril        | 20   | 570   | 6.67  |
| <i>Pseudo-nitzschia delicatissima</i> (Cleve) Heiden            | 40   | 14060 | 81.67 |
| <i>Pseudo-nitzschia pseudodelicatissima</i> (Hasle) Hasle       | 380  | 2280  | 5.00  |
| <i>Pseudo-nitzschia seriata</i> (Cleve) H.Peragallo             | 480  | 480   | 1.67  |
| <i>Rhizosolenia imbricata</i> Brightwell                        | 20   | 755   | 75.00 |

|                                                                           |     |       |       |
|---------------------------------------------------------------------------|-----|-------|-------|
| <i>Rhizosolenia hyalina</i> Ostensfeld                                    | 40  | 40    | 1.67  |
| <i>Rhizosolenia</i> sp.                                                   | 190 | 190   | 1.67  |
| <i>Skeletonema marinoi</i> Sarno & Zingone                                | 20  | 1515  | 8.33  |
| <i>Striatella unipunctata</i> (Lyngbye) C.Agardh                          | 20  | 120   | 5.00  |
| <i>Thalassionema frauenfeldii</i> (Grunow) Tempère & Peragallo            | 20  | 1515  | 50.00 |
| <i>Thalassionema nitzschioides</i> (Grunow) Mereschkowsky                 | 40  | 1325  | 15.00 |
| <i>Thalassiosira</i> sp.                                                  | 20  | 755   | 8.33  |
| <b>Dinoflagellates</b>                                                    |     |       |       |
| <i>Akashiwo sanguinea</i> (K.Hirasaka) Gert Hansen & Moestrup             | 95  | 95    | 1.67  |
| <i>Ceratium tripos</i> (Ostensfeld) Graham & Bronikovsky                  | 20  | 20    | 1.67  |
| <i>Dinophysis acuminata</i> Claparède & Lachmann                          | 20  | 20    | 3.33  |
| <i>Dinophysis caudata</i> Kent                                            | 20  | 20    | 1.67  |
| <i>Dinophysis</i> sp.                                                     | 20  | 20    | 1.67  |
| <i>Diplopsalis complex</i>                                                | 20  | 20    | 1.67  |
| <i>Dissodinium elegans</i> (Pavillard) Matzenauer                         | 95  | 95    | 1.67  |
| <i>Gonyaulax</i> sp.                                                      | 190 | 190   | 1.67  |
| <i>Gymnodinium</i> spp.                                                   | 190 | 190   | 1.67  |
| <i>Gyrodinium fusiforme</i> Kofoed & Swezy                                | 20  | 570   | 58.33 |
| <i>Gyrodinium</i> spp.                                                    | 20  | 380   | 5.00  |
| <i>Oxytoxum</i> sp.                                                       | 20  | 190   | 20.00 |
| <i>Phalacroma rotundatum</i> (Claparède & Lachmann) Kofoed & J.R.Michener | 20  | 40    | 3.33  |
| <i>Podolampas</i> sp.                                                     | 20  | 95    | 5.00  |
| <i>Prorocentrum micans</i> Ehrenberg                                      | 20  | 190   | 6.67  |
| <i>Prorocentrum minimum</i> (Pavillard) J.Schiller                        | 20  | 190   | 5.00  |
| <i>Protoperidinium</i> sp.                                                | 20  | 190   | 5.00  |
| <i>Protoperidinium steinii</i> (Jørgensen) Balech                         | 20  | 95    | 5.00  |
| <i>Pyrophacus</i> sp.                                                     | 20  | 95    | 3.33  |
| <i>Scrippsiellasp.</i>                                                    | 20  | 760   | 40.00 |
| <i>Tripos furca</i> (Ehrenberg) F.Gómez                                   | 20  | 190   | 15.00 |
| <i>Tripos fusus</i> (Ehrenberg) F.Gómez                                   | 20  | 190   | 5.00  |
| <i>Tripos massiliensis</i> (Gourret) F.Gómez                              | 20  | 20    | 3.33  |
| <i>Tripos</i> sp.                                                         | 20  | 380   | 8.33  |
| <i>Tripos teres</i> (Kofoed) F.Gómez                                      | 190 | 190   | 1.67  |
| N.D. dinoflagellates (micro)                                              | 20  | 970   | 51.67 |
| N.D. dinoflagellates (<20 µm)                                             | 95  | 23430 | 91.67 |
| <b>Coccolithophorids</b>                                                  |     |       |       |
| <i>Calciosolenia brasiliensis</i> (Lohmann) J.R.Young                     | 190 | 190   | 1.67  |

|                                             |      |      |       |
|---------------------------------------------|------|------|-------|
| <i>Calyptrosphaera oblonga</i> Lohmann      | 95   | 95   | 1.67  |
| <i>Ophiaster</i> sp.                        | 20   | 20   | 1.67  |
| <i>Syracosphaera pulchra</i> Lohman         | 20   | 20   | 1.67  |
| N.D. coccolithophorids (micro)              | 95   | 2840 | 8.33  |
| N.D. coccolithophorids (<10 $\mu\text{m}$ ) | 710  | 5680 | 55.00 |
| <b>Others</b>                               |      |      |       |
| Chlorophyceae                               | 710  | 3550 | 41.67 |
| Chrysophyceae                               | 3550 | 3550 | 1.67  |
| Cryptophyta                                 | 710  | 8510 | 50.00 |
| <i>Dictyocha fibula</i> Ehrenberg           | 20   | 380  | 8.33  |
| Other autotrophs                            | 1420 | 1420 | 1.67  |

**Supplementary Table S5.** Phytoplankton community biodiversity indices at station Struga (S1), Lastovo Island, South Adriatic. Abbreviations: S (total species number), N (total number of individuals), d (species richness), J' (Pielou's evenness), H' (Shannon-Weiner diversity), 1-  $\lambda$  (species diversity);  $\lambda$  (Simpson's Index).

| S  | N       | d        | J'       | H'(loge) | 1- $\lambda$ |
|----|---------|----------|----------|----------|--------------|
| 98 | 13156.6 | 10.22702 | 0.582843 | 2.672315 | 0.846061     |

**Supplementary Table S6.** Maximum bacterioplankton and picophytoplankton abundance determined by flow cytometry. Abbreviations: Max (maximum abundance), HB (heterotrophic bacteria); HNA HB (high nucleic acid heterotrophic bacteria); LNA HB (low nucleic acid heterotrophic bacteria), PRO (*Prochlorococcus*); SYN (*Synechococcus*); PPE (Picoeukaryotes);.

|           | Max (cell mL <sup>-1</sup> ) | Water layer | Date        |
|-----------|------------------------------|-------------|-------------|
| HB        | 6.28E+05                     | Thermocline | 15.7.2021   |
| LNA<br>HB | 3.62E+05                     | Thermocline | 17.7.2021   |
| HNA<br>HB | 3.23E+05                     | Surface     | 21.7.2021   |
| PRO       | 3.52E+04                     | DCM         | 17.07.2021. |
| SYN       | 1.47E+04                     | Thermocline | 18.07.2021. |
| PPE       | 1.51E+03                     | DCM         | 20.07.2021. |

**Supplementary Table S7.** Canonical correspondence analysis (CCA) results showing percentage of variability explained by constrained and unconstrained axes, eigenvalues for constrained axes, and ANOVA permutation test results (F and p value) for entire model and for constrained axis.

|                           | Variability explained | Eigenvalues | ANOVA        |              |
|---------------------------|-----------------------|-------------|--------------|--------------|
|                           |                       |             | F-test value | p value      |
| <b>Constrained axis</b>   | 0,183                 |             |              |              |
| <b>Unconstrained axis</b> | 0,817                 |             |              |              |
| <b>CCA1</b>               |                       | 0,026       | 6,591        | <b>0,001</b> |
| <b>CCA2</b>               |                       | 0,007       | 1,814        | 0,736        |
| <b>CCA model</b>          |                       |             | 1,939        | <b>0,003</b> |

## FIGURES

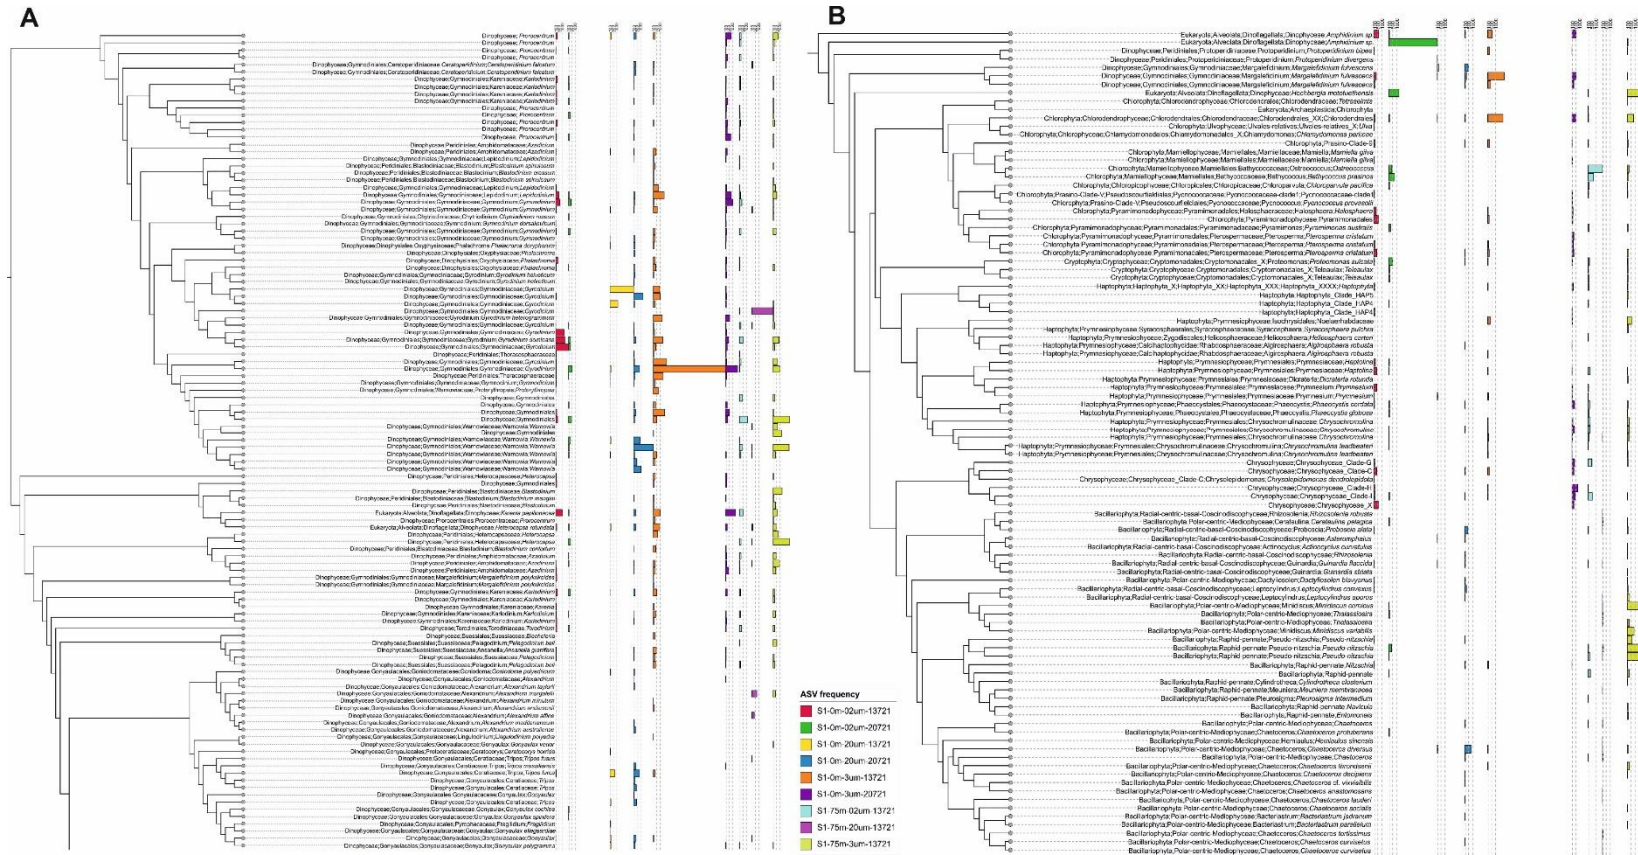

**Supplementary Figure S1.** Cladogram with adjacent ASV frequencies showing microscopy-relevant 211 taxa. Cladogram was constructed using plugin q2-phylogeny, MAFFT program, and FastTree, and visualized using iTOL 4.4.2. Taxonomy dataset generated in QIIME2 using PR2 database was added to the cladogram, representing 211 relevant taxa spread through Dinophyta, Cryptophyta, Haptophyta, Chlorophyta and Bacillariophyta. Sample frequency (number of ASVs identified as individual representative sequence) was added using FeatureTable.

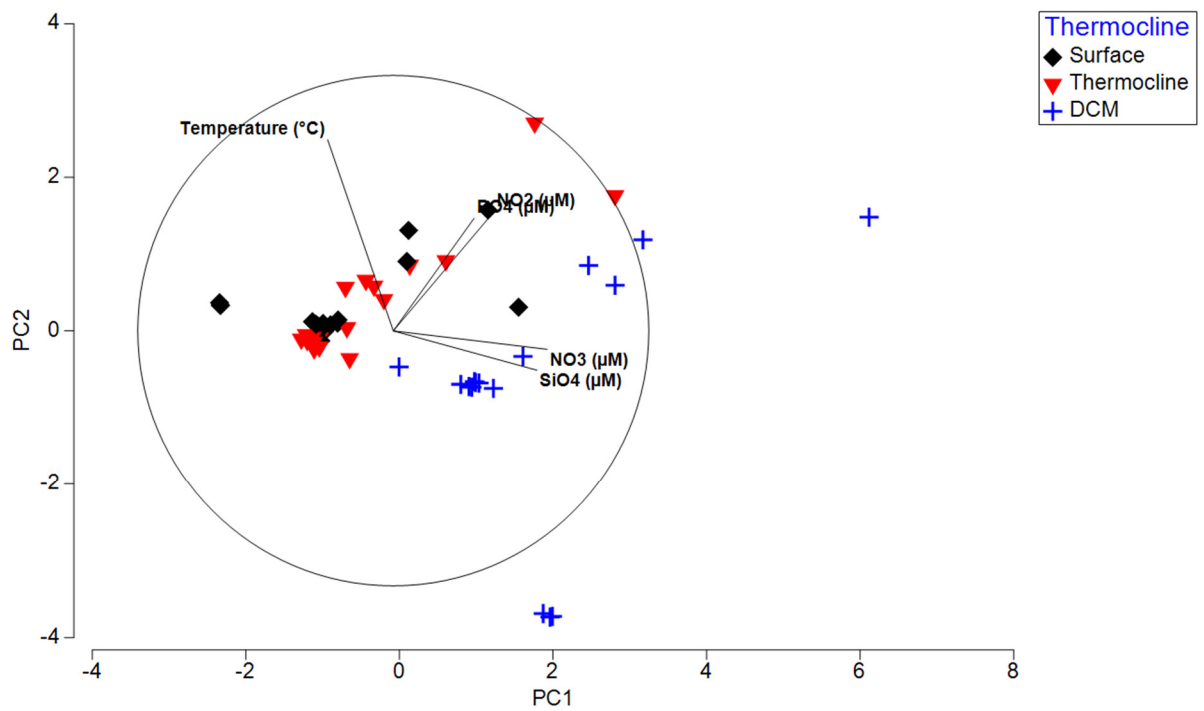

**Supplementary Figure S2.** Principal component analysis (PCA) of environmental variables with overlaid vectors whose direction and length indicate negative or positive correlations of abiotic variables with PC1 and PC2 axes.



(A)

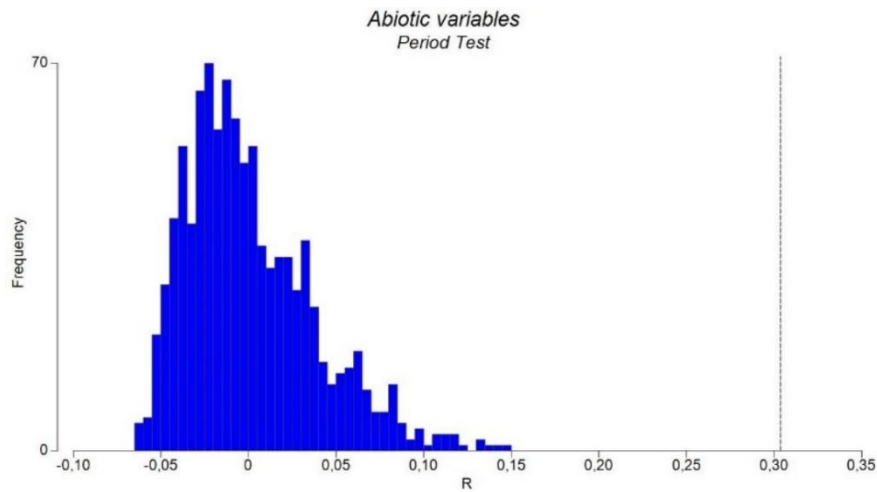

(B)

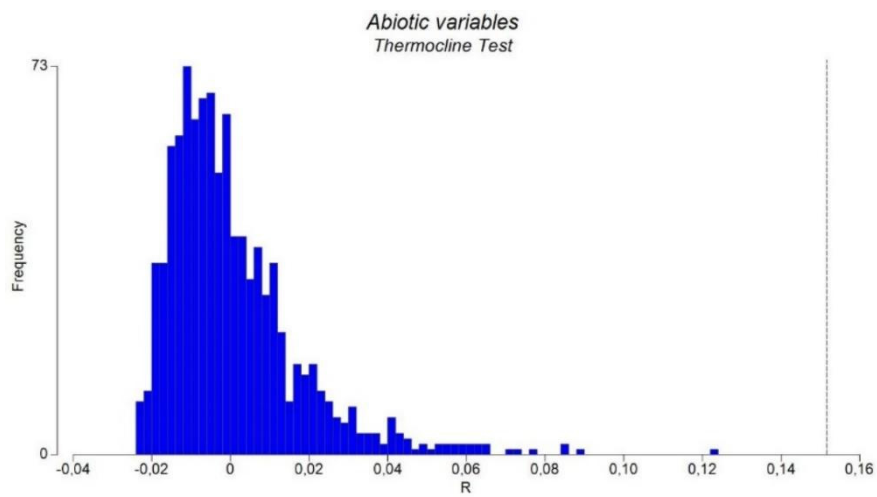

(C)

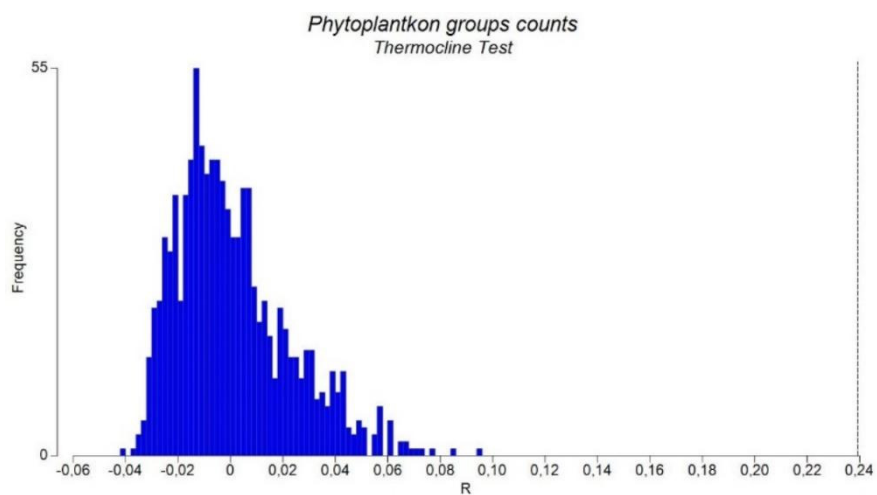

**Supplementary Figure S3.** Analysis of similarities (ANOSIM) test confirming: (A) significant nutrient concentration decrease after 16 July 2021, (B) significant nutrient gradient with distinct concentrations between surface, thermocline and deep chlorophyll maximum layer, (C) significant vertical distribution of nano-, micro-, picophytoplankton and bacterioplankton.
